# Supplementary material for: Three angular Zn2Dy complexes showing the effect of remote coordination at Zn and counter ions on slow magnetic relaxation at Dy centres
Source: Royal Society of Chemistry journal article supplement (doi:10.1039/d2nj01759h), 2022-01-01
Supplement: d2nj01759h1.pdf [file d2nj01759h1.pdf]

## Supplementary Information

### **Three angular Zn<sub>2</sub>Dy complexes showing effect of remote coordination at Zn and counter ions on the slow magnetic relaxation at Dy centre**

Anangamohan Panja<sup>\*a,b</sup> Zvonko Jagličić,<sup>c</sup> Paula Brandão,<sup>d</sup> Kuheli Pramanik <sup>a,b</sup>  
and Narayan Ch. Jana,<sup>a</sup>

<sup>a</sup> *Department of Chemistry, Panskura Banamali College, Panskura RS, WB 721152, India*

<sup>b</sup> *Department of Chemistry, Gokhale Memorial Girls' College, 1/1 Harish Mukherjee Road, Kolkata-700020, India.*

<sup>c</sup> *Institute of Mathematics, Physics and Mechanics & Faculty of Civil and Geodetic Engineering, University of Ljubljana, Jadranska 19, 1000 Ljubljana, Slovenia*

<sup>d</sup> *Department of Chemistry, CICECO-Aveiro Institute of Materials, University of Aveiro, 3810-193 Aveiro, Portugal*

\* Corresponding author e-mail: ampanja@yahoo.co.in

## Table of Contents

|                                                                                                                                                                                                                                                           |    |
|-----------------------------------------------------------------------------------------------------------------------------------------------------------------------------------------------------------------------------------------------------------|----|
| <b>Table S1.</b> Bond distances around metal coordination spheres in <b>1–3</b> .....                                                                                                                                                                     | 4  |
| <b>Table S2.</b> SHAPE analysis of the Dy(III) ion for complexes <b>1–3</b> .....                                                                                                                                                                         | 4  |
| <b>Table S3.</b> Relaxation fitting parameters from the least-square fitting of the Cole-Cole plots of <b>1</b> in the temperature range 1.9 K–10.0 K by the generalized Debye model.....                                                                 | 5  |
| <b>Table S4.</b> The splitting of ${}^6\text{H}_{15/2}$ the lowest multiplets for <b>1</b> calculated by CASSCF/SINGLE_ANISO together with <i>g</i> -values for each Kramers doublets.....                                                                | 6  |
| <b>Table S5.</b> The splitting of ${}^6\text{H}_{15/2}$ the lowest multiplets for <b>2</b> calculated by CASSCF/SINGLE_ANISO together with <i>g</i> -values for each Kramers doublets.....                                                                | 6  |
| <b>Table S6.</b> The splitting of ${}^6\text{H}_{15/2}$ the lowest multiplets for <b>3</b> calculated by CASSCF/SINGLE_ANISO together with <i>g</i> -values for each Kramers doublets.....                                                                | 6  |
| <b>Fig. S1.</b> Asymmetric unit of complex <b>2</b> displaying a nitrate ion with half occupancy together with a scatter molecule of water of crystallisation over a same region. The bottom half showing contribution of each part in the full map. .... | 7  |
| <b>Fig. S2.</b> ${}^1\text{H}$ NMR of Schiff base ligand <i>N,N'</i> -bis(3-methoxy-5-methylsalicylidene)-1,2-phenylenediamine ( $\text{H}_2\text{L}$ ) in $\text{CDCl}_3$ at r.t.....                                                                    | 8  |
| <b>Fig. S3:</b> ${}^{13}\text{C}$ NMR of Schiff base ligand <i>N,N'</i> -bis(3-methoxy-5-methylsalicylidene)-1,2-phenylenediamine ( $\text{H}_2\text{L}$ ) in $\text{CDCl}_3$ at r.t.....                                                                 | 8  |
| <b>Fig. S4:</b> (a), (b) and (c) represent experimental and simulated PXRD patterns of <b>1–3</b> . ....                                                                                                                                                  | 9  |
| <b>Fig. S5.</b> A part of crystal packing of <b>1–3</b> showing both trimolecular and intermolecular $\pi$ – $\pi$ interactions.....                                                                                                                      | 10 |
| <b>Fig. S6.</b> Magnetization plots of <b>1–3</b> at 2 K.....                                                                                                                                                                                             | 11 |
| <b>Fig. S7.</b> (a) to (c) represent the real and imaginary parts of ac susceptibility in 0 kOe dc field as a function of temperature for complexes <b>1–3</b> , respectively .....                                                                       | 12 |
| <b>Fig. S8.</b> Real and imaginary part of ac susceptibility at 2 K as a function of dc magnetic field (Top) and frequency (Bottom) for <b>1</b> . ....                                                                                                   | 13 |
| <b>Fig. S9.</b> Real and imaginary part of ac susceptibility at 2 K as a function of dc magnetic field (Top) and frequency (Bottom) for <b>2</b> . ....                                                                                                   | 14 |
| <b>Fig. S10.</b> Real and imaginary part of ac susceptibility at 2 K as a function of dc magnetic field (Top) and frequency (Bottom) for <b>3</b> . ....                                                                                                  | 15 |
| <b>Fig. S11.</b> (a) and (b) represent the temperature dependence of the in-phase ac susceptibility component of <b>2</b> and <b>3</b> , respectively, measured at 1.0 kOe applied magnetic field.....                                                    | 15 |
| <b>Fig. S12.</b> Frequency dependence of the in-phase and out-of-phase ac susceptibility components of <b>2</b> measured in the temperature range 1.9–10 K and at 1.0 kOe applied magnetic field.....                                                     | 16 |
| <b>Fig. S13.</b> Frequency dependence of the in-phase and out-of-phase ac susceptibility components of <b>3</b> measured in the temperature range 1.9–10 K and at 1.0 kOe applied magnetic field.....                                                     | 17 |

**Fig. S14.** The molecular structures of **1-3** derived from the experimental X-ray geometry used for CASSCF calculations overlaid with of  $g$ -tensor of the first Kramers doublet ( $x/y/z$ -axis are showed as red/green/blue arrows). The magnetic anisotropy axis calculated by Magellan is showed as an orange arrow. ....18

**Fig. S15.** The fits of experimental magnetic data of **1-3** utilizing CASSCF calculations, SINGLE\_ANISO program and homemade routine. The best-fitted parameters:  $zJ = -0.0755 \text{ cm}^{-1}$  with scaling coefficient 1.018 for **1**,  $zJ = -0.0588 \text{ cm}^{-1}$  with scaling coefficient 1.036 for **2**,  $zJ = -0.0718 \text{ cm}^{-1}$  with scaling coefficient 1.059 for **3**. ....19

**Table S1.** Bond distances around metal coordination spheres in **1–3**

| Bond           | Distances             |          |          |
|----------------|-----------------------|----------|----------|
|                | <b>1</b> <sup>#</sup> | <b>2</b> | <b>3</b> |
| Dy–O1          | 2.271(5)              | 2.322(2) | 2.273(2) |
| Dy–O2(or O4)   | 2.692(6)              | 2.679(2) | 2.673(2) |
| Dy–O3 (or O12) | 2.343(6)              | 2.255(2) | 2.347(2) |
| Dy–O5(or O8)   | 2.370(7)              | 2.324(2) | 2.354(2) |
| Zn–X (Cl/Br/I) | 2.269(2)              | 2.399(1) | 2.616(1) |
| Zn–O1          | 2.030(5)              | 2.034(2) | 2.024(2) |
| Zn–O3(or O12)  | 2.051(5)              | 2.007(1) | 2.049(2) |
| Zn–N1          | 2.099(6)              | 2.043(2) | 2.084(2) |
| Zn–N2          | 2.061(7)              | 2.067(2) | 2.058(2) |
| Dy···Zn        | 3.493(1)              | 3.460(2) | 3.494(1) |

<sup>#</sup> Bond distances of only one crystallographically independent complex cation are given

**Table S2.** SHAPE analysis of the Dy(III) ion for complexes **1–3**.

| Label  | Shape               | Symmetry | Distortion (1) |        | Distortion (2) | Distortion (3) |
|--------|---------------------|----------|----------------|--------|----------------|----------------|
|        |                     |          | Dy1            | Dy2    | Dy1            | Dy1            |
| OP-8   | Octagon             | $D_{8h}$ | 30.198         | 30.419 | 32.728         | 32.943         |
| HPY-8  | Heptagonal pyramid  | $C_{7v}$ | 20.888         | 20.265 | 23.134         | 23.359         |
| HBPY-8 | Hexagonal bipyramid | $D_{6h}$ | 9.520          | 10.056 | 9.646          | 9.888          |

|          |                                            |          |              |              |              |              |
|----------|--------------------------------------------|----------|--------------|--------------|--------------|--------------|
| CU-8     | Cube                                       | $O_h$    | <b>4.628</b> | <b>5.232</b> | <b>3.923</b> | <b>4.053</b> |
| SAPR-8   | Square antiprism                           | $D_{4d}$ | <b>4.547</b> | <b>4.451</b> | <b>4.303</b> | <b>3.993</b> |
| TDD-8    | Triangular dodecahedron                    | $D_{2d}$ | <b>3.948</b> | <b>3.774</b> | <b>4.082</b> | <b>3.870</b> |
| JGBF-8   | Johnson gyrobifastigium J26                | $D_{2d}$ | 13.159       | 13.081       | 13.568       | 13.542       |
| JETBPY-8 | Johnson elongated triangular bipyramid J14 | $C_{3h}$ | 23.758       | 23.879       | 24.070       | 24.342       |
| JBTPR-8  | Biaugmented trigonal prism J50             | $C_{2v}$ | 6.326        | 6.056        | 6.480        | 6.232        |
| BTPR-8   | Biaugmented trigonal prism                 | $C_{2v}$ | 6.292        | 6.049        | 6.406        | 6.114        |
| JSD-8    | Snub diphenooid J84                        | $D_{2d}$ | 6.971        | 6.555        | 7.542        | 7.385        |
| TT-8     | Triakis tetrahedron                        | $T_d$    | <b>4.662</b> | <b>5.207</b> | <b>3.923</b> | <b>4.109</b> |
| ETBPY-8  | Elongated trigonal bipyramid               | $D_{3h}$ | 17.997       | 17.229       | 18.682       | 18.511       |

**Table S3.** Relaxation fitting parameters from the least-square fitting of the Cole-Cole plots of **1** in the temperature range 1.9 K–10.0 K by the generalized Debye model.

| $T$ (K) | $\chi_s$ (emu/mol) | $\Delta\chi$ (emu/mol) | $\tau$ (s) | $\alpha$ |
|---------|--------------------|------------------------|------------|----------|
| 1.9     | 0.35551            | 4.65656                | 0.00174    | 0.39228  |
| 2.09    | 0.31816            | 4.21951                | 0.00143    | 0.40764  |
| 2.29    | 0.33228            | 3.87446                | 0.00122    | 0.40024  |
| 2.48    | 0.34971            | 3.56489                | 0.00104    | 0.38936  |
| 2.67    | 0.37044            | 3.29147                | 8.95E-04   | 0.37728  |
| 2.87    | 0.38152            | 3.05708                | 7.71E-04   | 0.36621  |
| 3.06    | 0.39714            | 2.84116                | 6.69E-04   | 0.35638  |
| 3.25    | 0.40019            | 2.66563                | 5.78E-04   | 0.35015  |
| 3.45    | 0.40001            | 2.50865                | 4.99E-04   | 0.34642  |
| 3.64    | 0.43253            | 2.32625                | 4.43E-04   | 0.3353   |
| 3.83    | 0.40186            | 2.23298                | 3.71E-04   | 0.34367  |
| 4.03    | 0.41895            | 2.09582                | 3.27E-04   | 0.34188  |
| 4.22    | 0.41187            | 1.99915                | 2.83E-04   | 0.34685  |
| 4.42    | 0.43362            | 1.88362                | 2.55E-04   | 0.34749  |
| 4.61    | 0.44638            | 1.77849                | 2.27E-04   | 0.34723  |
| 4.8     | 0.44607            | 1.69649                | 2.01E-04   | 0.35071  |
| 5       | 0.4752             | 1.58714                | 1.83E-04   | 0.34981  |
| 5.5     | 0.52473            | 1.36045                | 1.47E-04   | 0.3481   |
| 6       | 0.54882            | 1.18664                | 1.16E-04   | 0.34969  |
| 6.5     | 0.5756             | 1.03525                | 9.69E-05   | 0.33992  |
| 7       | 0.61795            | 0.88424                | 8.36E-05   | 0.33394  |
| 7.5     | 0.63094            | 0.7758                 | 7.00E-05   | 0.32766  |
| 8       | 0.67865            | 0.64245                | 6.53E-05   | 0.31186  |
| 8.5     | 0.62598            | 0.62317                | 4.38E-05   | 0.3293   |
| 9       | 0.62037            | 0.56338                | 3.53E-05   | 0.3325   |
| 9.5     | 0.49801            | 0.62674                | 1.85E-05   | 0.3577   |
| 10      | 0.33254            | 0.74001                | 8.11E-06   | 0.39487  |

**Table S4.** The splitting of  ${}^6\text{H}_{15/2}$  the lowest multiplets for **1** calculated by CASSCF/SINGLE\_ANISO together with  $g$ -values for each Kramers doublets

| $E$ (cm $^{-1}$ ) | $g_x$ | $g_y$ | $g_z$  |
|-------------------|-------|-------|--------|
| 0                 | 0.123 | 0.267 | 19.029 |
| 108               | 0.874 | 1.434 | 15.916 |
| 164               | 1.276 | 3.224 | 12.800 |
| 224               | 3.288 | 3.986 | 9.772  |
| 283               | 0.236 | 0.973 | 18.277 |
| 346               | 2.539 | 5.330 | 8.256  |
| 412               | 1.992 | 6.389 | 13.077 |
| 614               | 0.057 | 0.155 | 19.220 |

**Table S5.** The splitting of  ${}^6\text{H}_{15/2}$  the lowest multiplets for **2** calculated by CASSCF/SINGLE\_ANISO together with  $g$ -values for each Kramers doublets

| $E$ (cm $^{-1}$ ) | $g_x$ | $g_y$ | $g_z$  |
|-------------------|-------|-------|--------|
| 0                 | 0.072 | 0.167 | 19.224 |
| 114               | 0.624 | 0.751 | 16.521 |
| 200               | 0.857 | 1.475 | 14.829 |
| 255               | 0.458 | 2.401 | 13.754 |
| 333               | 1.039 | 2.373 | 11.553 |
| 409               | 3.069 | 5.393 | 11.696 |
| 554               | 0.630 | 0.865 | 18.468 |
| 719               | 0.063 | 0.201 | 19.428 |

**Table S6.** The splitting of  ${}^6\text{H}_{15/2}$  the lowest multiplets for **3** calculated by CASSCF/SINGLE\_ANISO together with  $g$ -values for each Kramers doublets

| $E$ (cm $^{-1}$ ) | $g_x$ | $g_y$ | $g_z$  |
|-------------------|-------|-------|--------|
| 0                 | 0.064 | 0.132 | 19.318 |



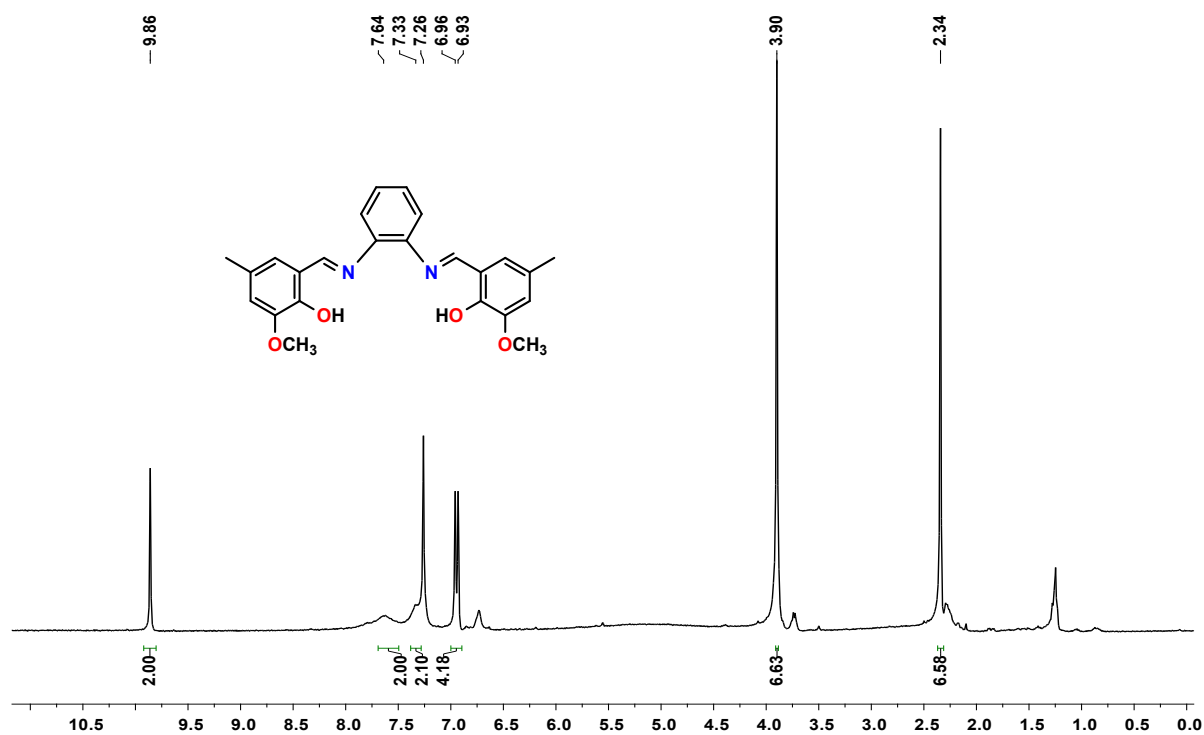

**Fig. S2.**  $^1H$  NMR of Schiff base ligand *N,N'*-bis(3-methoxy-5-methylsalicylidene)-1,2-phenylenediamine ( $H_2L$ ) in  $CDCl_3$  at r.t.

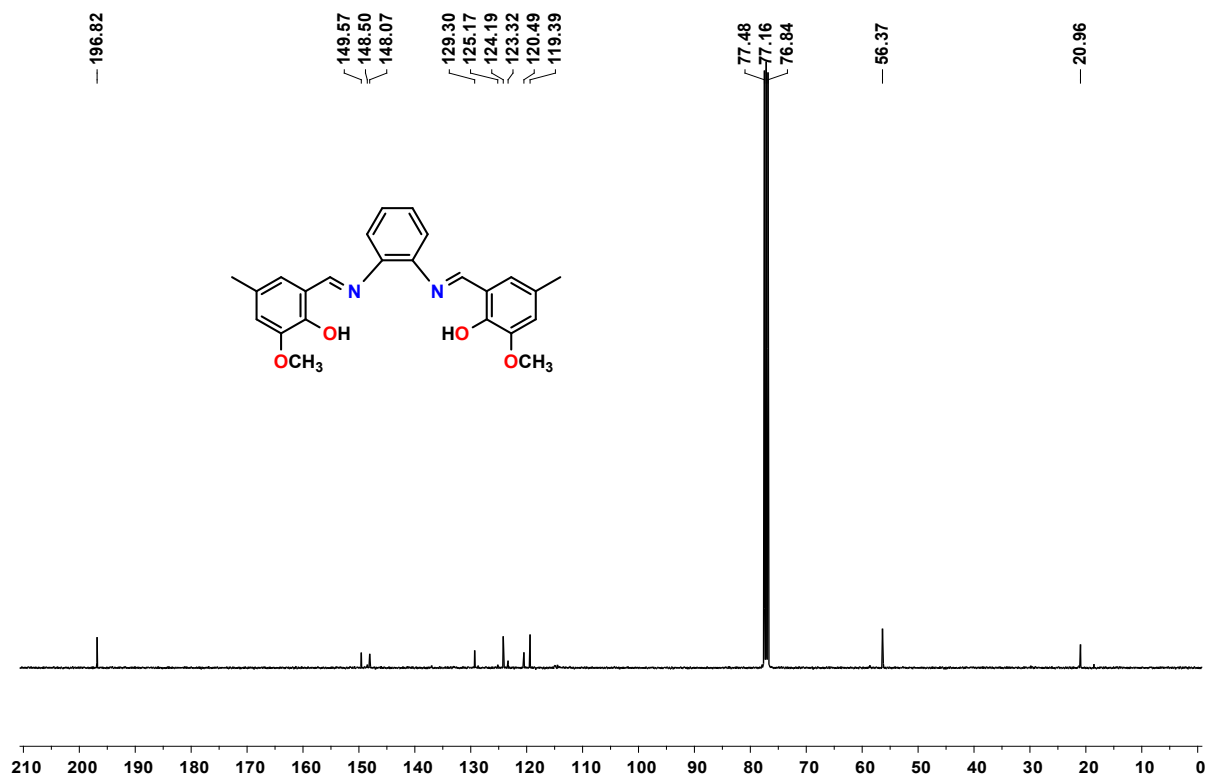



**Fig. S3:**  $^{13}\text{C}$  NMR of Schiff base ligand  $N,N'$ -bis(3-methoxy-5-methylsalicylidene)-1,2-phenylenediamine ( $\text{H}_2\text{L}$ ) in  $\text{CDCl}_3$  at r.t.

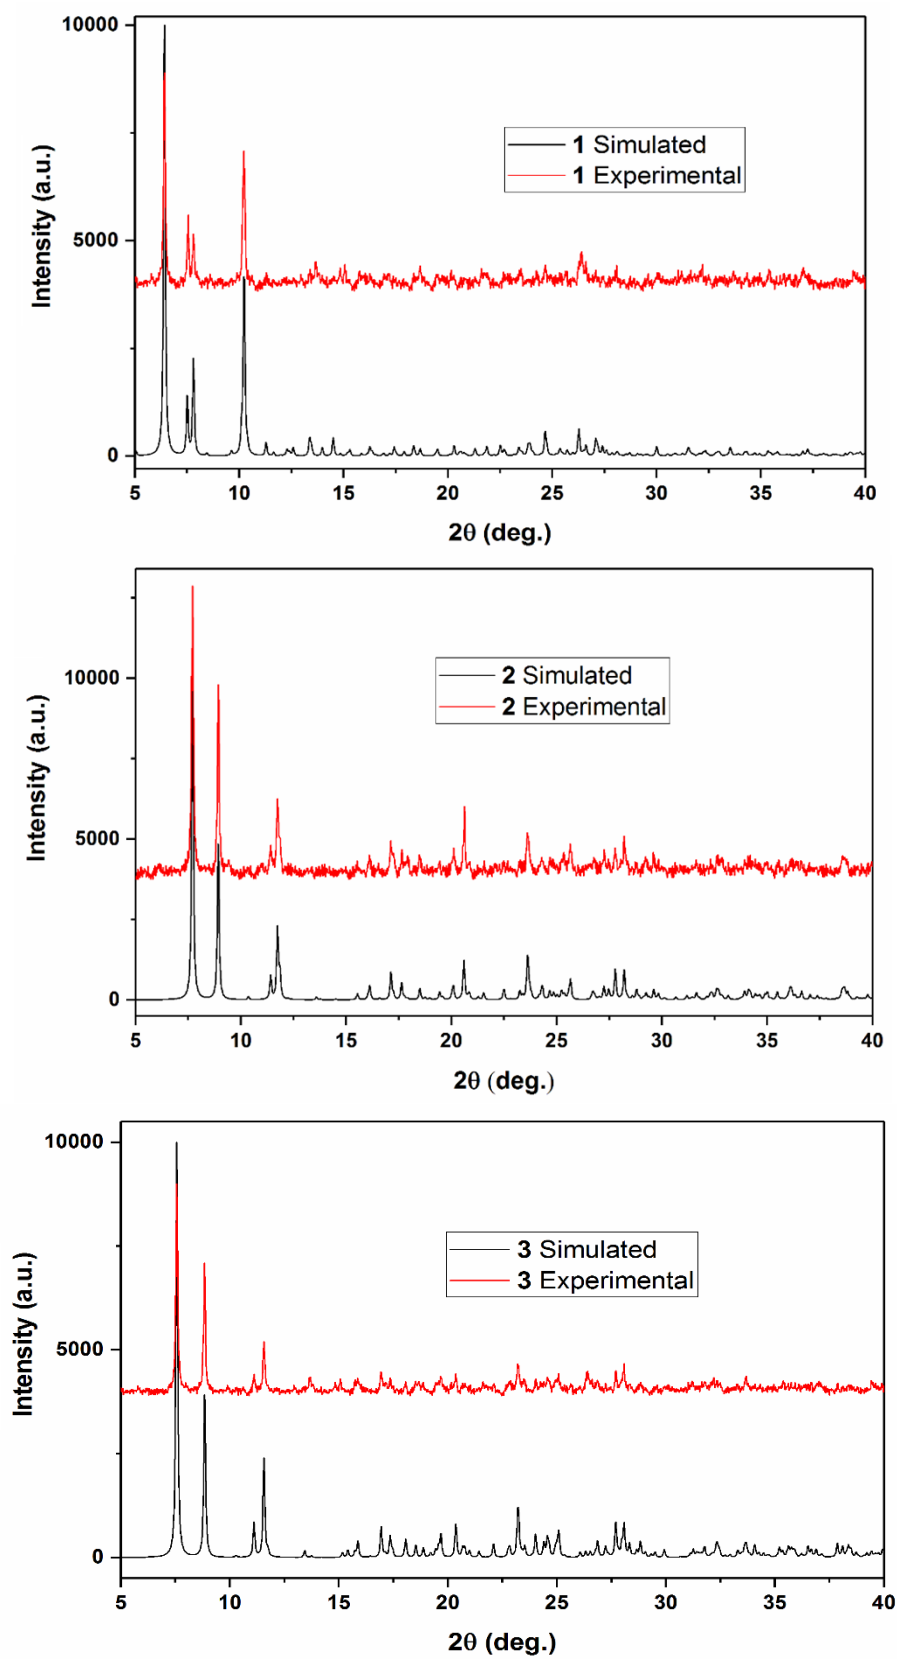

**Fig. S4:** (a), (b) and (c) represent experimental and simulated PXRD patterns of **1-3**.

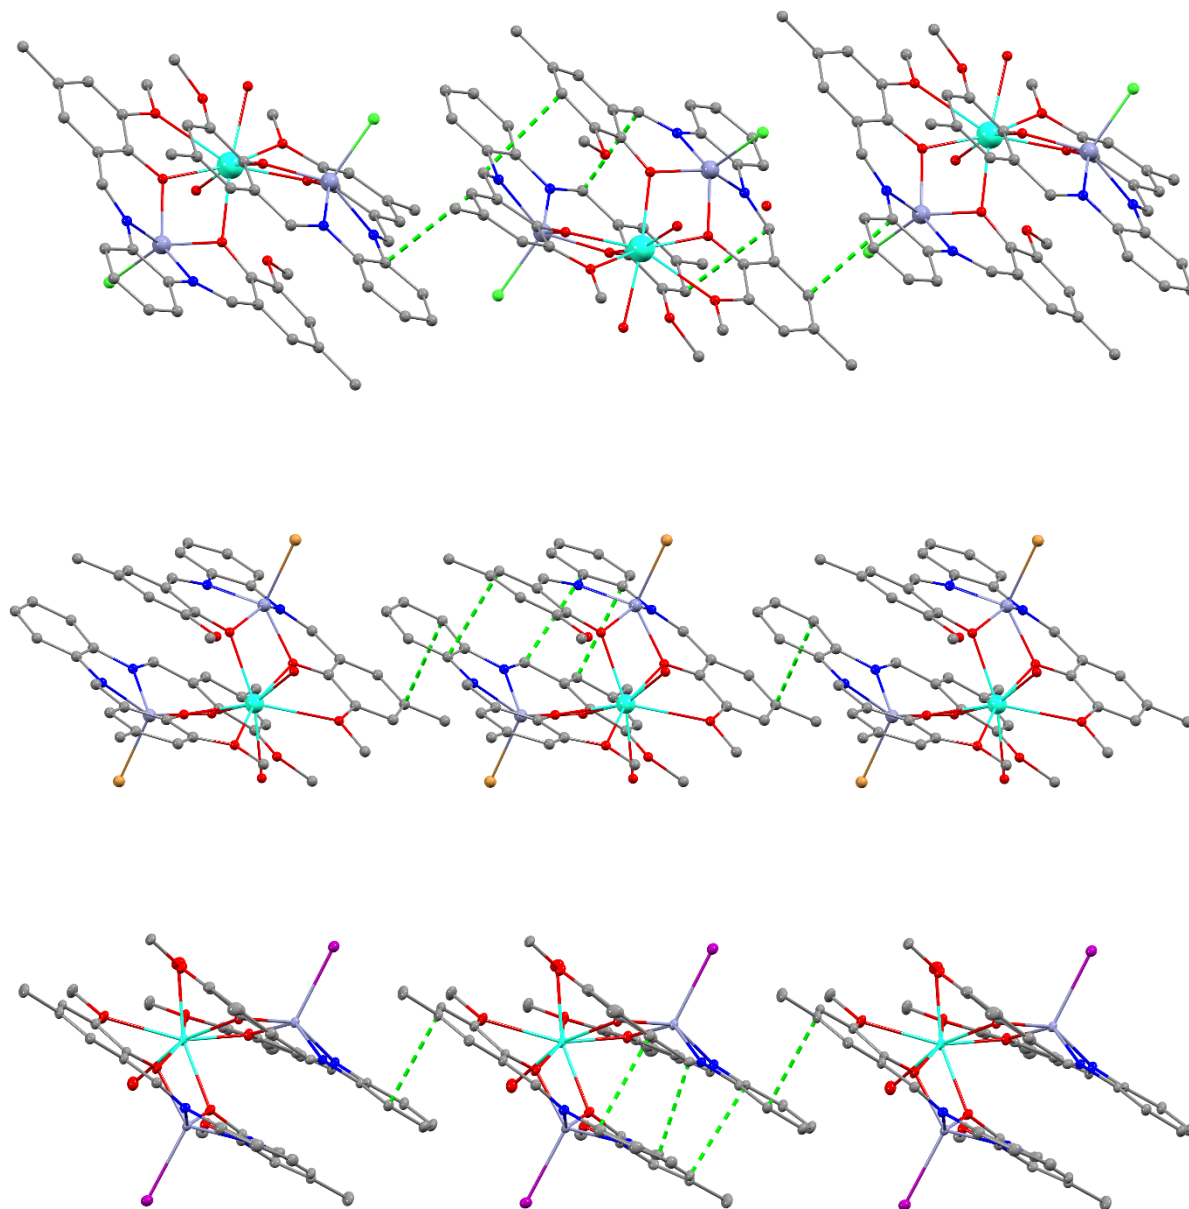

**Fig. S5.** A part of crystal packing of **1-3** showing both trimolecular and intermolecular  $\pi$ - $\pi$  interactions.

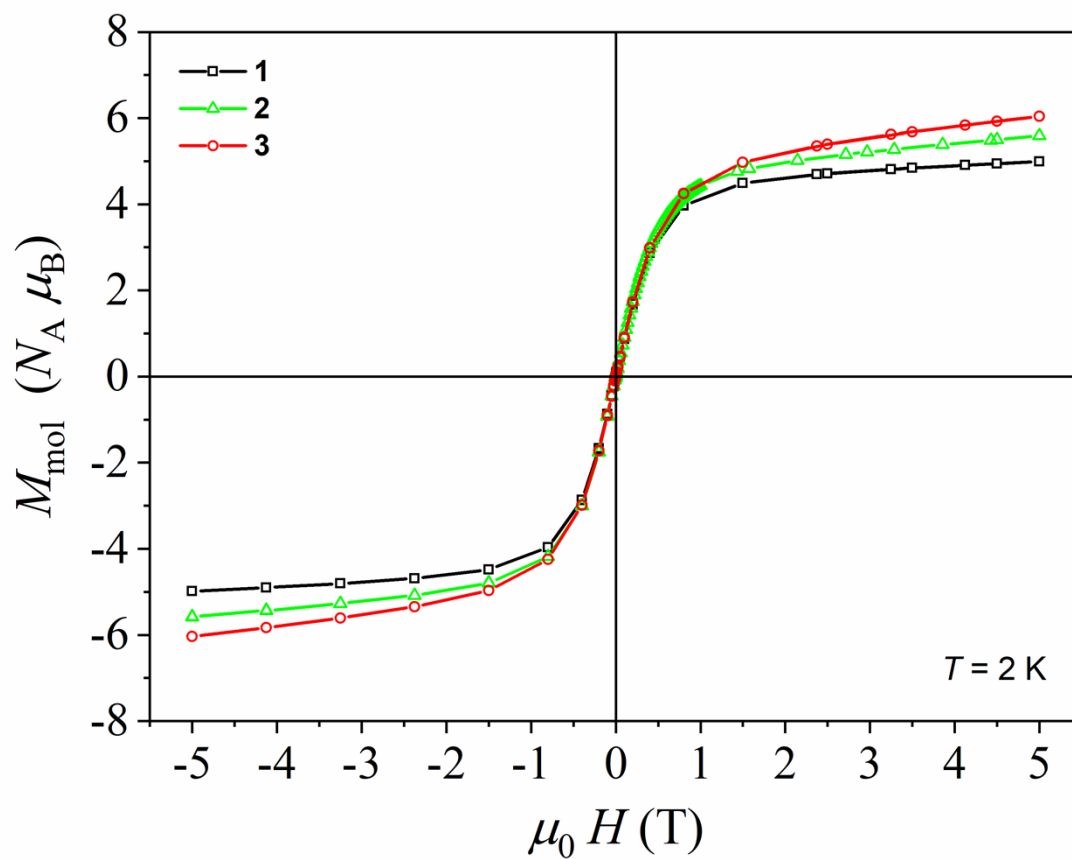

**Fig. S6.** Magnetization plots of **1–3** at 2 K.

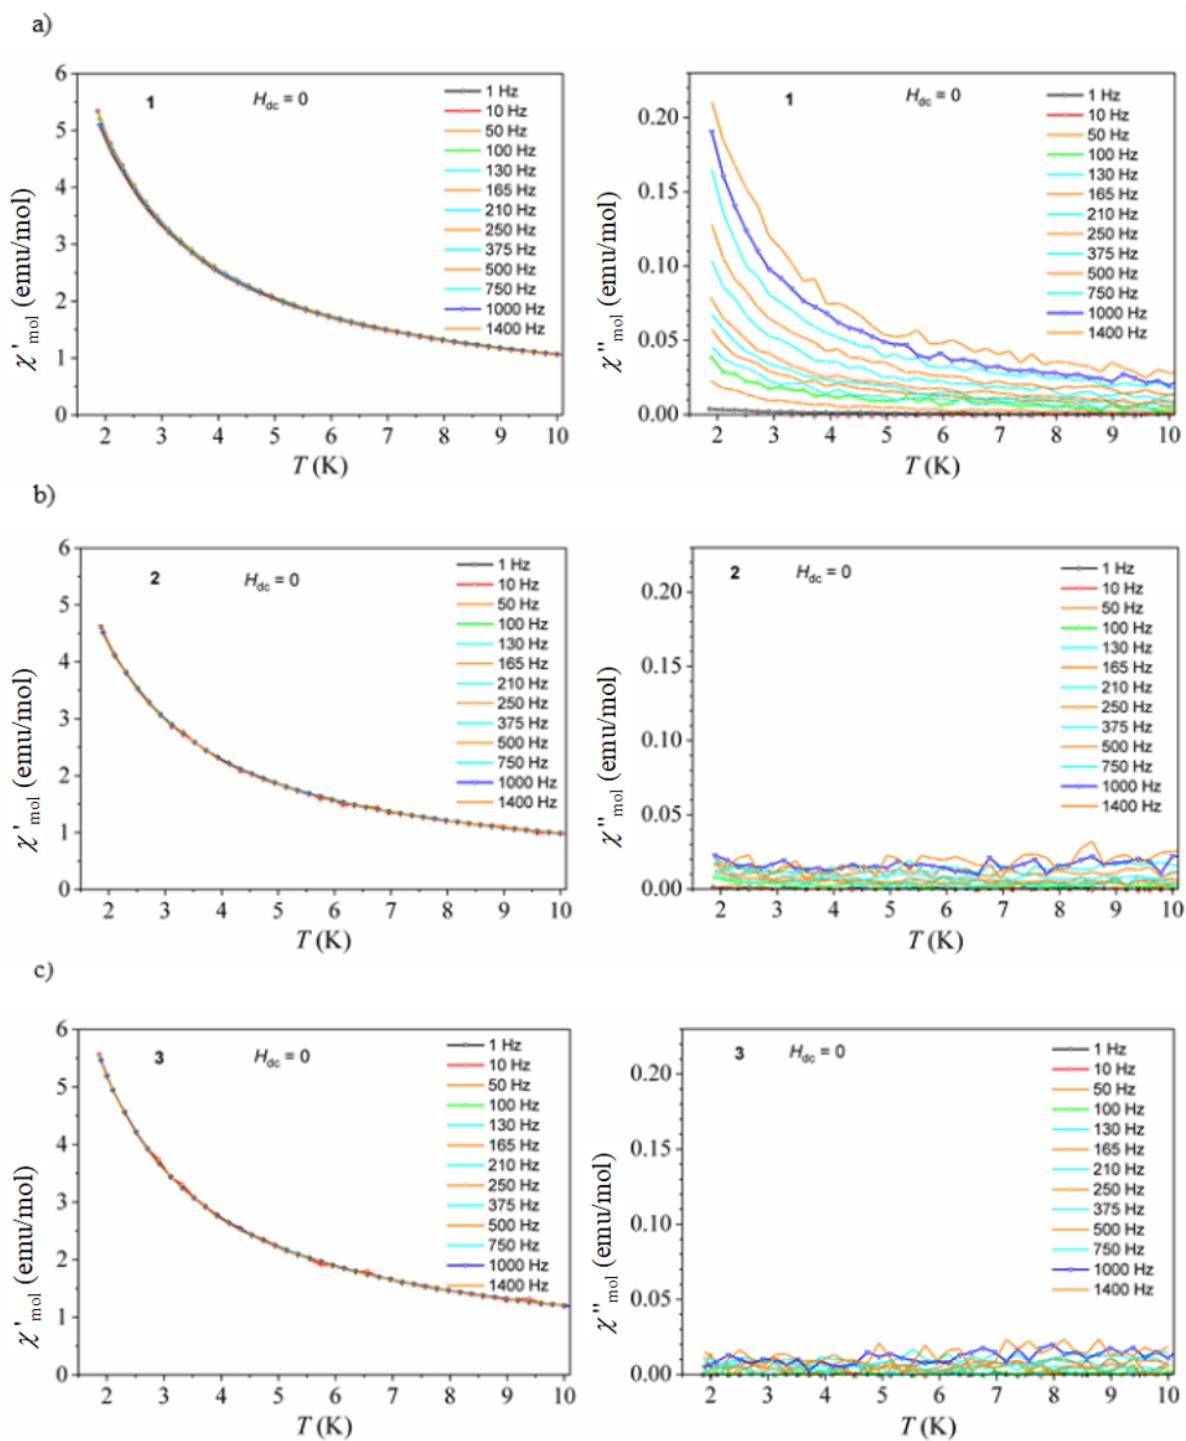

**Fig. S7.** (a) to (c) represent the real and imaginary parts of ac susceptibility in 0 kOe dc field as a function of temperature for complexes 1–3, respectively

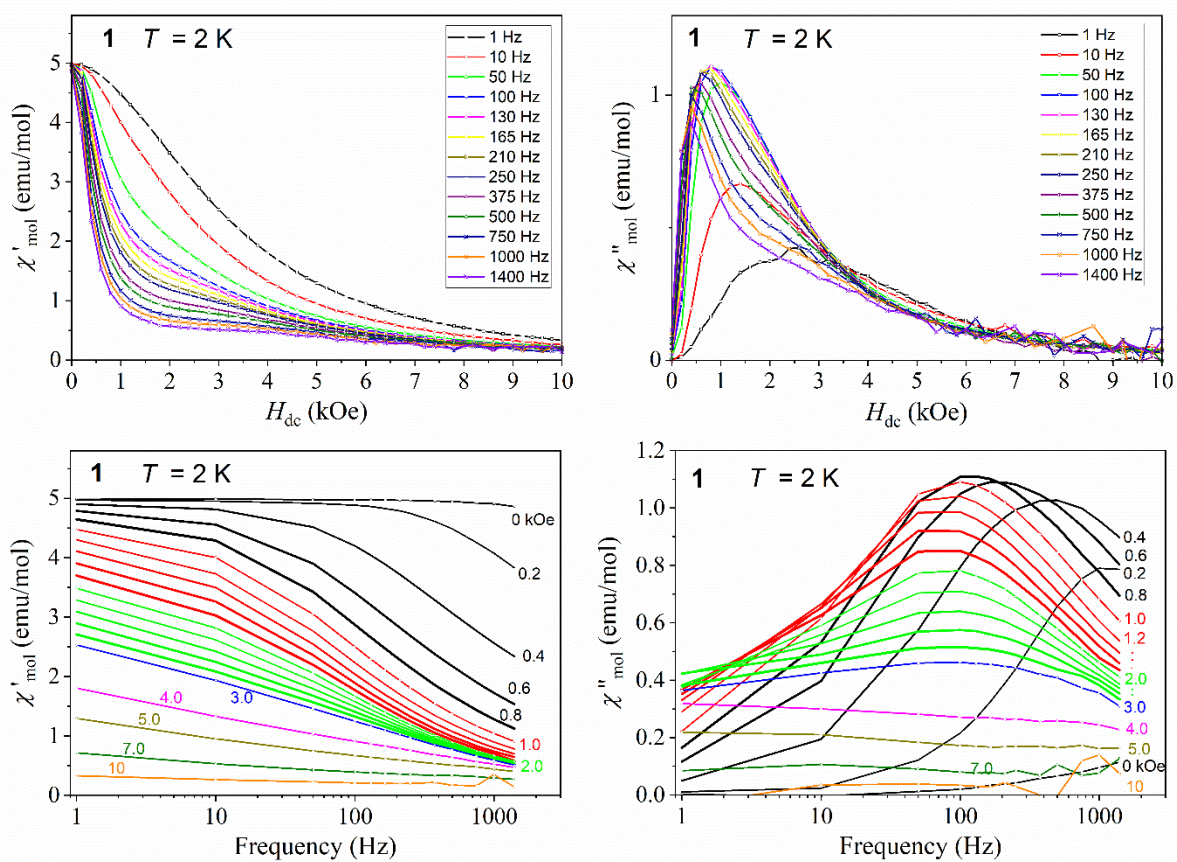

**Fig. S8.** Real and imaginary part of ac susceptibility at 2 K as a function of dc magnetic field (Top) and frequency (Bottom) for **1**.



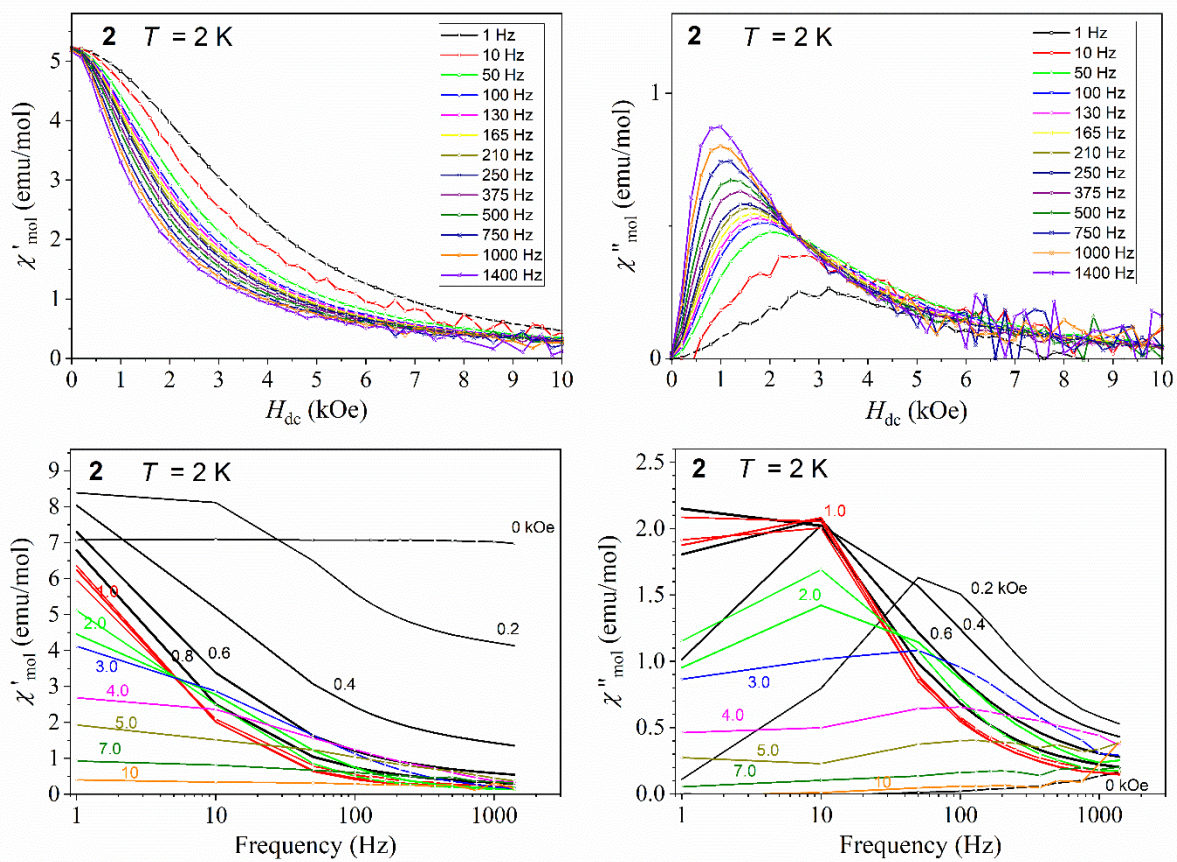

**Fig. S9.** Real and imaginary part of ac susceptibility at 2 K as a function of dc magnetic field (Top) and frequency (Bottom) for **2**.

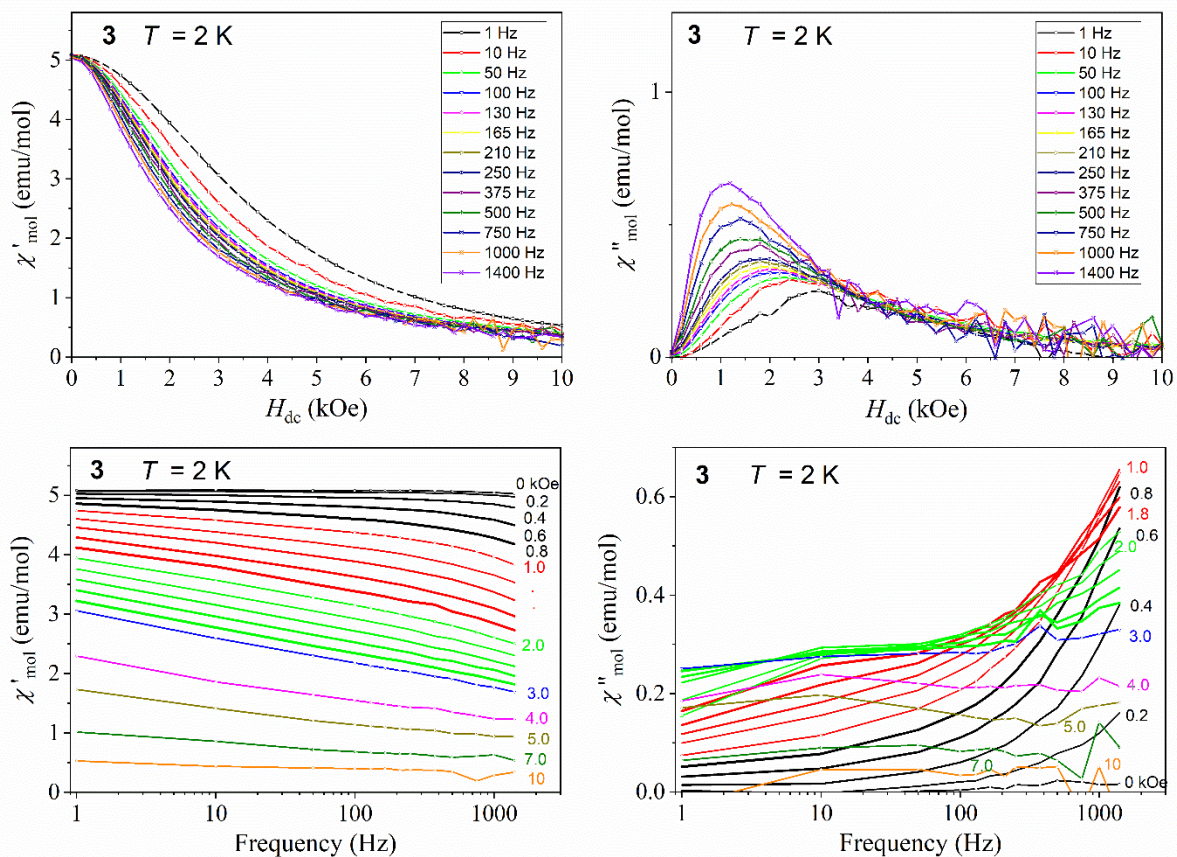

**Fig. S10.** Real and imaginary part of ac susceptibility at 2 K as a function of dc magnetic field (Top) and frequency (Bottom) for **3**.

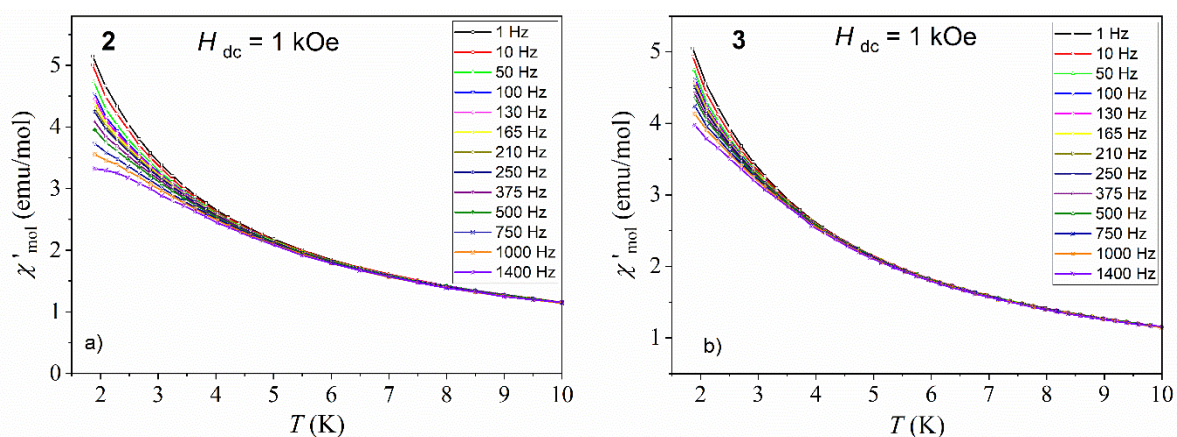

**Fig. S11.** (a) and (b) represent the temperature dependence of the in-phase ac susceptibility component of **2** and **3**, respectively, measured at 1.0 kOe applied magnetic field.

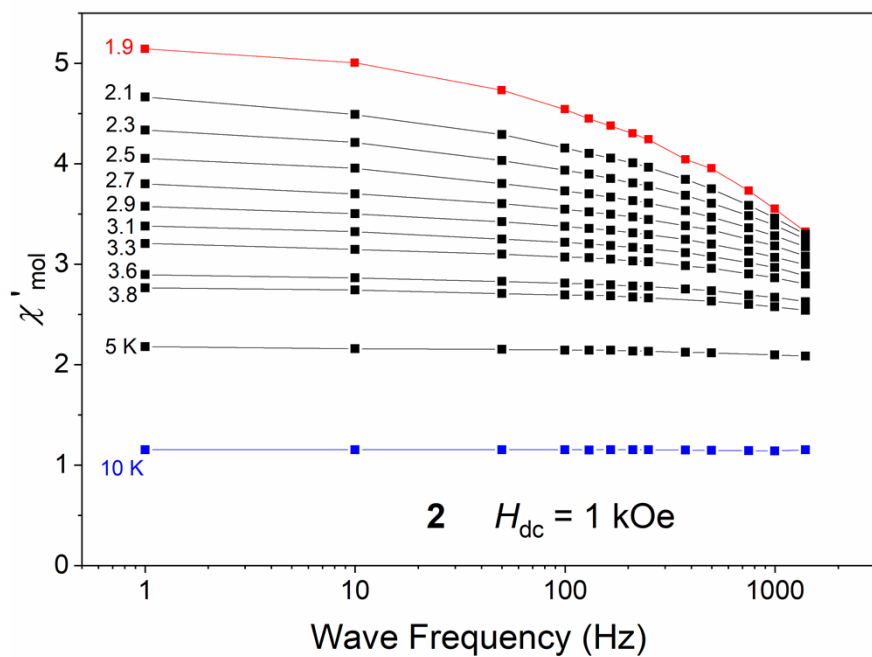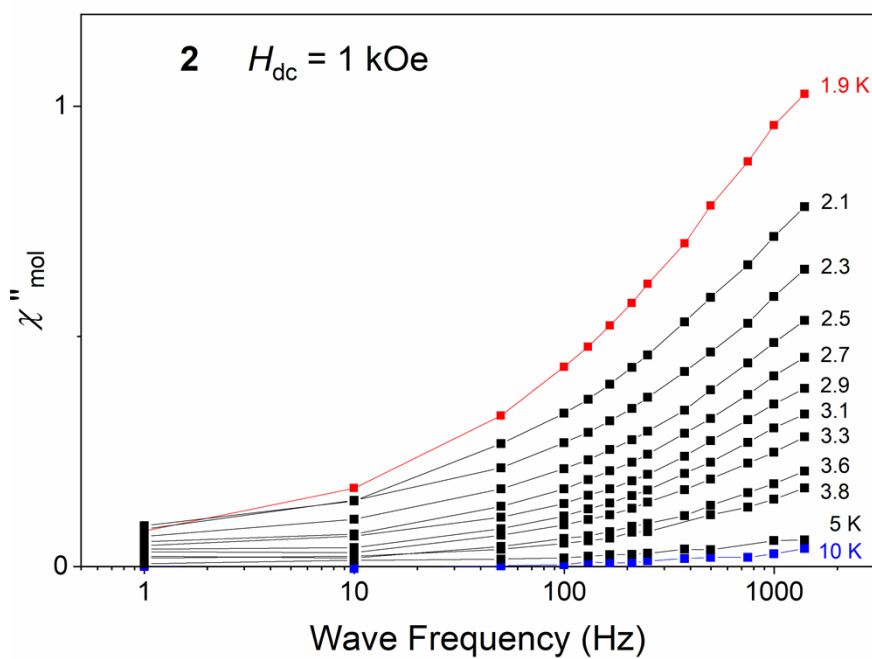

**Fig. S12.** Frequency dependence of the in-phase and out-of-phase ac susceptibility components of **2** measured in the temperature range 1.9–10 K and at 1.0 kOe applied magnetic field.



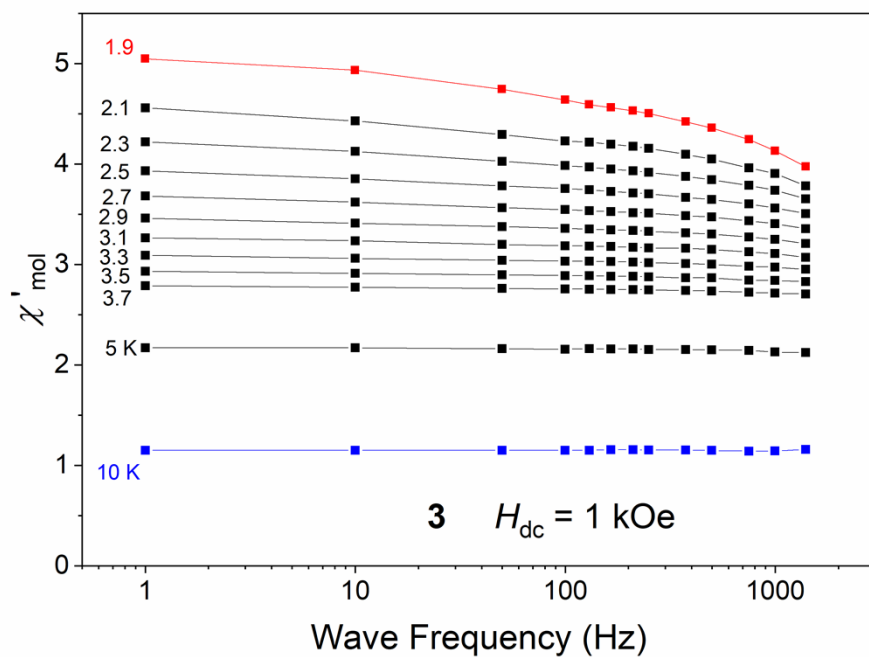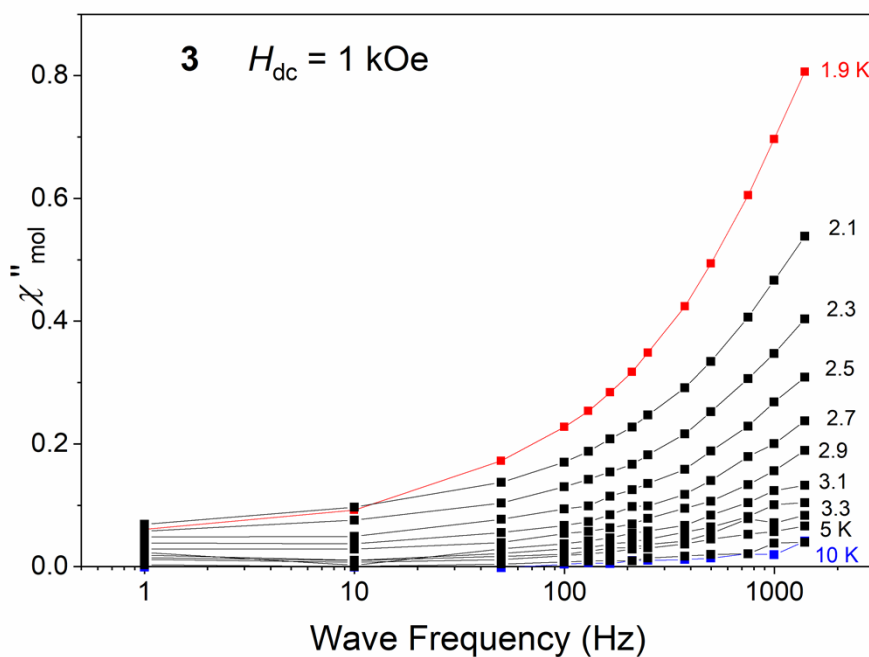

**Fig. S13.** Frequency dependence of the in-phase and out-of-phase ac susceptibility components of **3** measured in the temperature range 1.9–10 K and at 1.0 kOe applied magnetic field.

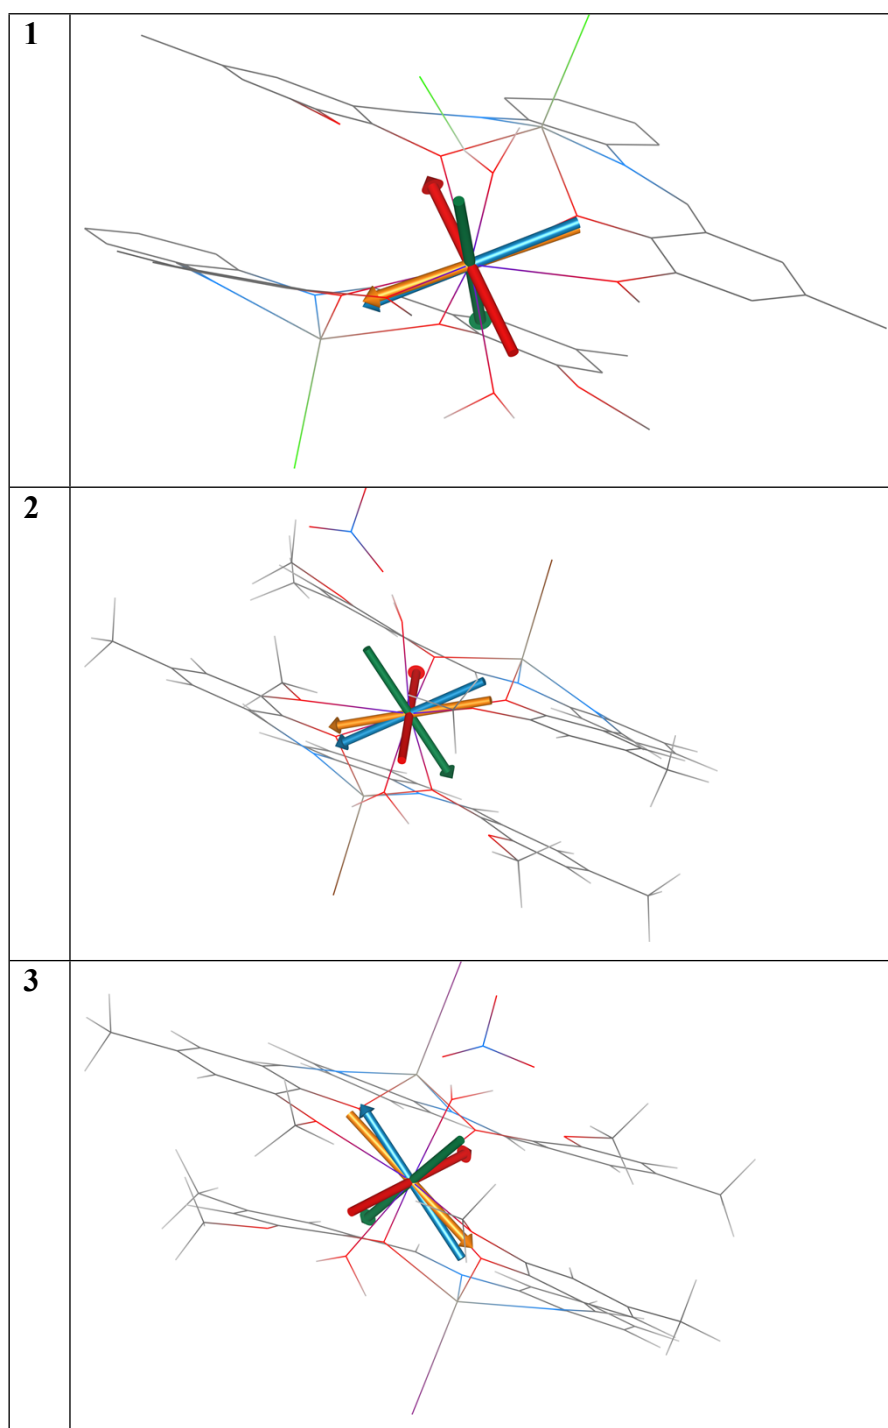

**Fig. S14.** The molecular structures of **1-3** derived from the experimental X-ray geometry used for CASSCF calculations overlaid with of  $g$ -tensor of the first Kramers doublet ( $x/y/z$ -axis are showed as red/green/blue arrows). The magnetic anisotropy axis calculated by Magellan is showed as an orange arrow.

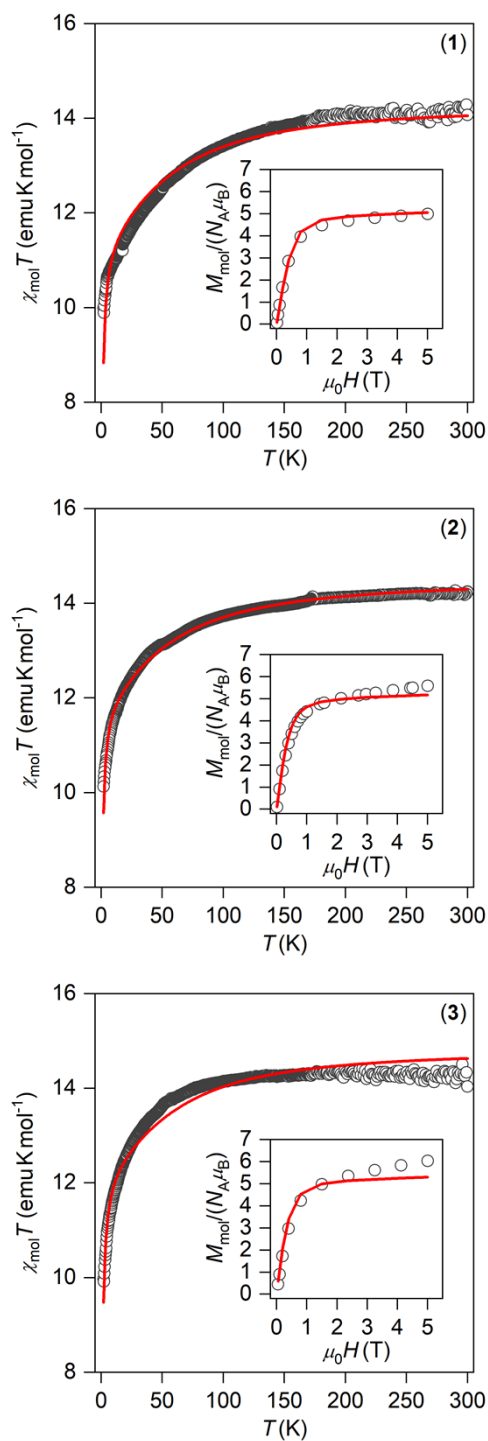

**Fig. S15.** The fits of experimental magnetic data of **1-3** utilizing CASSCF calculations, SINGLE\_ANISO program and homemade routine. The best-fitted parameters:  $zJ = -0.0755 \text{ cm}^{-1}$  with scaling coefficient 1.018 for **1**,  $zJ = -0.0588 \text{ cm}^{-1}$  with scaling coefficient 1.036 for **2**,  $zJ = -0.0718 \text{ cm}^{-1}$  with scaling coefficient 1.059 for **3**.
